# Supplementary material for: Solution-processed MoS2nanotubes/reduced graphene oxide nanocomposite as an active electrocatalyst toward the hydrogen evolution reaction
Source: Royal Society of Chemistry journal article supplement (doi:10.1039/c6ra11147e), 2016-01-01
Supplement: c6ra11147e1.pdf [file c6ra11147e1.pdf]

## 1 **Supplementary Figures and Tables.**

2

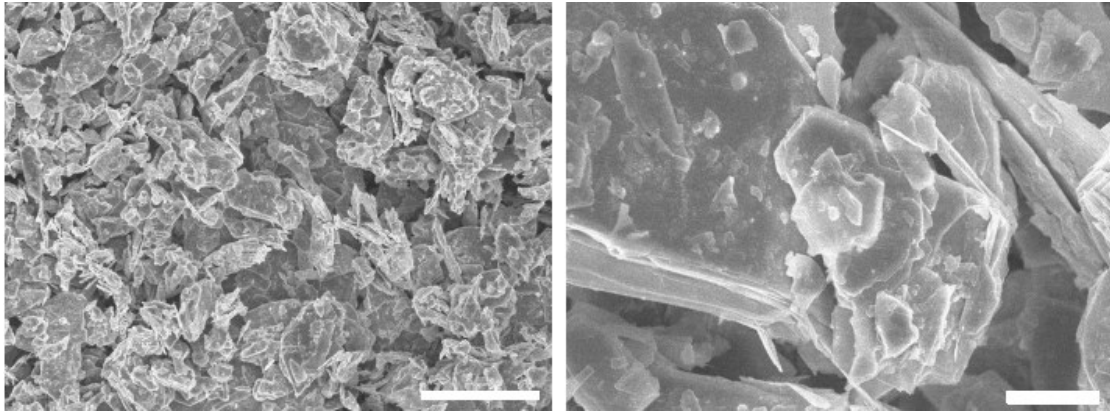

3

4 Fig. S1. SEM images of typical commercial Bulk MoS<sub>2</sub> (BM). The scale bars are 10 μm and 1 μm,

5 respectively.

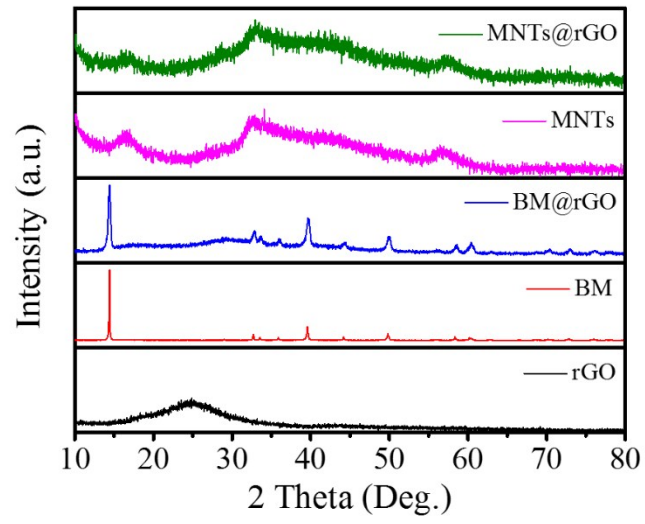

1

2 Fig. S2. XRD patterns of rGO, BM, BM@rGO, MNTs and MNTs@rGO.

3

1 For MNTs@rGO hybrids, all the characteristic diffraction peaks of MNTs can be  
2 observed, while the absence of peaks at low-angle region indicates that the MoS<sub>2</sub>  
3 nanosheets are not restacked, which is beneficial for the exposure of electrocatalytic  
4 active sites. Moreover, the absence of diffraction peaks for rGO in the composites  
5 may be ascribed to the relative low content of rGO and the relatively higher intensity  
6 of the diffraction peaks for MNTs.

7

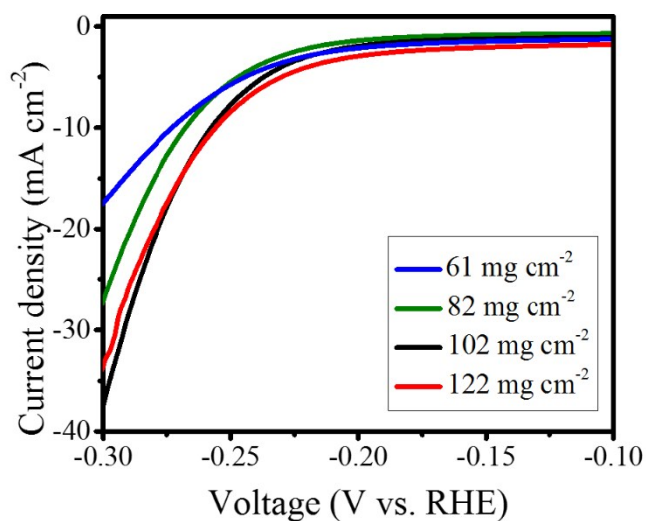

8

9 Fig. S3. The polarization curves of MNTs@rGO at different loading weight.

10

11

1 **Table S1. Comparison of the electrocatalytic activity of MNTs@rGO to some**  
 2 **representative MoS<sub>2</sub>-based HER catalysts reported in the literature.**

3

| Sample                                                                   | Onset Potential<br>(mV vs. RHE) | Tafel Slope<br>(mV dec <sup>-1</sup> ) | $\eta$ (mV vs. RHE)<br>for $J = -10$ mA<br>cm <sup>-2</sup> | Catalyst<br>loading<br>( $\mu\text{g cm}^{-2}$ ) | Ref.         |
|--------------------------------------------------------------------------|---------------------------------|----------------------------------------|-------------------------------------------------------------|--------------------------------------------------|--------------|
| MoS <sub>2</sub> composite (nanosheets<br>& quantum dots)                | -120                            | 69                                     | ~ 250                                                       | 35.7                                             | S1           |
| 2D MoS <sub>2</sub> nanosheets                                           | -80                             | 90                                     | ~ 210                                                       | 571                                              | S2           |
| Pd coated MoS <sub>2</sub> nanoflowers                                   | -218                            | 39                                     | -                                                           | 3538                                             | S3           |
| MoS <sub>2</sub> nanoflowers@rGO                                         | -190                            | 95                                     | 285                                                         | -                                                | S4           |
| Defect-rich MoS <sub>2</sub>                                             | -120                            | 50                                     | 180                                                         | 285                                              | S5           |
| Nanoporous MoS <sub>2</sub>                                              | ~ -150                          | 50                                     | 270                                                         | 60                                               | S6           |
| MoS <sub>3</sub> nanoparticles                                           | -150                            | 41-63                                  | 260                                                         | 32                                               | S7           |
| MoO <sub>3</sub> -MoS <sub>2</sub> core-shell<br>nanowires               | -150                            | 50-60                                  | 250                                                         | 60                                               | S8           |
| MoS <sub>2</sub> @carbon paper                                           | -200                            | 120                                    | -                                                           | -                                                | S9           |
| Supported [Mo <sub>3</sub> S <sub>4</sub> ] <sup>4+</sup>                | -200                            | 120                                    | 280                                                         | -                                                | S10          |
| Graphene nanoribbon-<br>supported MoS <sub>2</sub> nanosheets            | -110                            | 43.4                                   | 180                                                         | 285                                              | S11          |
| S-doped carbon modified<br>MoS <sub>2</sub> nanosheets                   | -60                             | 72                                     | ~ 180                                                       | -                                                | S12          |
| MoS <sub>2</sub> quantum dots<br>interspersed in MoS <sub>2</sub> sheets | -190                            | 74                                     | -                                                           | -                                                | S13          |
| MNTs@rGO                                                                 | -180                            | 69                                     | 250                                                         | 102                                              | This<br>work |

4

## 1 Double layer capacitance ( $C_{dl}$ ) calculations.

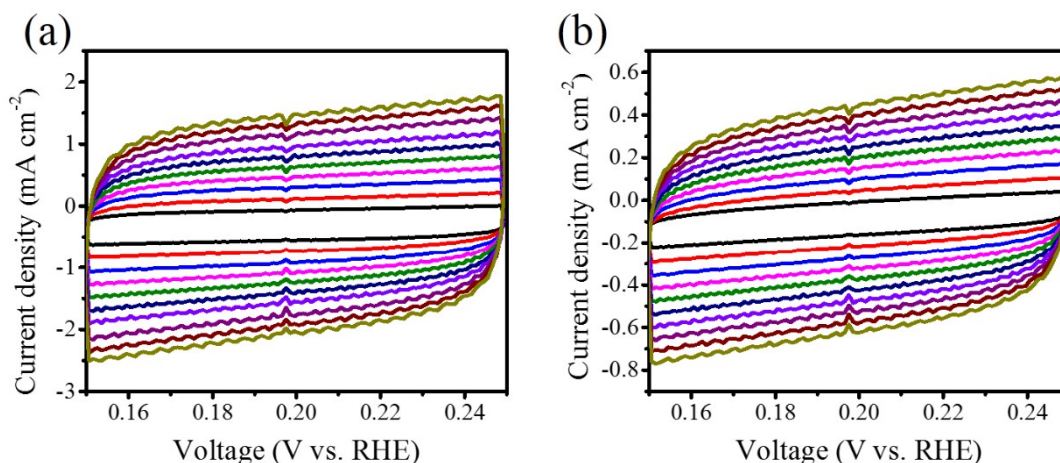

2

3 Fig. S4. CV curves of MNTs@rGO (a) and BM@rGO (b) at different scan rates in the potential  
4 region of 0.15–0.25 V vs. RHE, respectively.

5

6 To estimate the effective active surface area of the MNTs@rGO and BM@rGO, the  
7 CV curves were performed at a series of scan rates (20, 40, 60, 80, 100, 120, 140, 160,  
8 180 and 200  $\text{mV s}^{-1}$ ) in the potential range of 0.15–0.25 V vs. RHE, which was  
9 considered as the double layer capacitance ( $C_{dl}$ ) behavior. The  $C_{dl}$  values of  
10 MNTs@rGO and BM@rGO were estimated by plotting the  $\Delta J$  ( $J_{\text{anodic}} - J_{\text{cathodic}}$ ) at 0.2  
11 V vs. RHE against the scan rate, where the slope of the resulting curve was twice of  
12 the  $C_{dl}$  (Fig. 4e).<sup>S11</sup>

13

1 **Turnover frequency (TOF) calculations.**

2 The TOF value is calculated from the equation: <sup>S15</sup>

3 
$$\text{TOF} = (J * A) / (2 * F * n)$$

4 where  $J$  is the current density at a given overpotential,  $A$  is the surface area of the  
5 electrode, the number 2 means two electrons are required to form one hydrogen  
6 molecule from two protons,  $F$  is the Faraday constant and  $M$  is the number of moles  
7 of sulfide atoms on the electrode. It must be noted that this TOF estimate assumes that  
8 all of the S atoms present in the material are catalytically active. However, only the  
9 edges of the MoS<sub>2</sub> are identified as the active sites for the HER reactions, where the  
10 unsaturated S atoms are exposed and can absorb protons with a small free energy.<sup>S16</sup>  
11 The vast majority of the S atoms in the nanotubes are expected to play a purely  
12 structural role, which results in a gross overestimate of the real number of active sites.  
13 Thus, we can conclude that the calculated TOFs only represented the lower limit.

14

1 **Table S2. Fit parameters of EIS spectra measured at different  $\eta$  values for**  
2 **MNTs@rGO modified electrode**

3

| $\eta$ (mV) | $R_{ct}$ ( $\Omega$ ) | $R_m$ ( $\Omega$ ) | $C_{int}$ (F) | $\tau_{ct}$ ( $\Omega^{1/2}$ F $^{1/2}$ ) | $\tau_m$ ( $\Omega^{1/2}$ F $^{1/2}$ ) |
|-------------|-----------------------|--------------------|---------------|-------------------------------------------|----------------------------------------|
| 150         | 273.3                 | 6.311              | 0.00697       | 1.90534                                   | 0.044                                  |
| 160         | 182                   | 6.168              | 0.00691       | 1.25758                                   | 0.04262                                |
| 170         | 125.6                 | 5.871              | 0.00684       | 0.85861                                   | 0.04013                                |
| 180         | 88.19                 | 5.541              | 0.00676       | 0.59616                                   | 0.03746                                |
| 190         | 62.11                 | 5.297              | 0.0067        | 0.41632                                   | 0.03551                                |
| 200         | 44.6                  | 4.843              | 0.00667       | 0.29733                                   | 0.03229                                |
| 210         | 32.74                 | 4.682              | 0.00656       | 0.21484                                   | 0.03072                                |
| 220         | 24.48                 | 4.415              | 0.00649       | 0.15888                                   | 0.02866                                |
| 230         | 18.85                 | 4.18               | 0.0064        | 0.12057                                   | 0.02674                                |
| 240         | 14.35                 | 3.917              | 0.00644       | 0.09235                                   | 0.02521                                |
| 250         | 11.14                 | 3.757              | 0.0064        | 0.07126                                   | 0.02403                                |
| 260         | 8.99                  | 3.41               | 0.00659       | 0.05922                                   | 0.02246                                |

4



1 **Table S3. Fit parameters of EIS spectra measured at different  $\eta$  values for**  
2 **BM@rGO modified electrode**

3

| $\eta$ (mV) | $R_{ct}$ ( $\Omega$ ) | $R_m$ ( $\Omega$ ) | $C_{int}$ (F) | $\tau_{ct}$ ( $\Omega^{1/2}$ F $^{1/2}$ ) | $\tau_m$ ( $\Omega^{1/2}$ F $^{1/2}$ ) |
|-------------|-----------------------|--------------------|---------------|-------------------------------------------|----------------------------------------|
| 230         | 3269                  | 7.907              | 0.00125       | 4.0771                                    | 0.00986                                |
| 240         | 3054                  | 7.999              | 0.00121       | 3.70145                                   | 0.00969                                |
| 250         | 1860                  | 7.721              | 0.00128       | 2.37522                                   | 0.00986                                |
| 260         | 2358                  | 8.008              | 0.00119       | 2.79871                                   | 0.0095                                 |
| 270         | 1845                  | 8.042              | 0.00117       | 2.16123                                   | 0.00942                                |
| 280         | 1696                  | 8.205              | 0.00114       | 1.93853                                   | 0.00938                                |
| 290         | 1496                  | 8.274              | 0.00113       | 1.6836                                    | 0.00931                                |
| 300         | 1385                  | 8.465              | 0.0011        | 1.52392                                   | 0.00931                                |
| 310         | 1234                  | 9.015              | 0.00105       | 1.32556                                   | 0.00945                                |
| 320         | 1219                  | 9.533              | 0.00101       | 1.22826                                   | 0.00961                                |
| 330         | 1155                  | 10.09              | 0.00097       | 1.12235                                   | 0.0098                                 |
| 340         | 975.4                 | 10.9               | 0.00093       | 0.90849                                   | 0.01015                                |

4

5

## 1 **References to Supplementary Information**

- 2 S1. S. Xu, D. Li and P. Wu, *Adv. Funct. Mater.*, 2015, **25**, 1127.
- 3 S2. S. Muralikrishna, K. Manjunath, D. Samrat, V. Reddy, T. Ramakrishnappa and  
4 D.H. Nagaraju, *RSC Adv.*, 2015, **5**, 89389.
- 5 S3. B. B. Li, S. Z. Qiao, X. R. Zheng, X. J. Yang, Z. D. Cui, S. L. Zhu, Z. Y. Li and Y.  
6 Q. Liang, *J. Power Sources*, 2015, **284**, 68.
- 7 S4. C. B. Ma, X. Qi, B. Chen, S. Bao, Z. Yin, X. J. Wu, Z. Luo, J. Wei, H. L. Zhang  
8 and H. Zhang, *Nanoscale*, 2014, **6**, 5624.
- 9 S5. J. Xie, H. Zhang, S. Li, R. Wang, X. Sun, M. Zhou, J. Zhou, X. W. (David) Lou  
10 and Y. Xie, *Adv. Mater.*, 2013, **25**, 5807.
- 11 S6. J. Kibsgaard, Z. Chen, B. N. Reinecke and T. F. Jaramillo, *Nature Mater.*, 2012,  
12 **11**, 963.
- 13 S7. H. Vrubel, D. Merki and X. Hu, *Energy Environ. Sci.*, 2012, **5**, 6136.
- 14 S8. Z. Chen, D. Cummins, B. N. Reinecke, E. Clark, M. K. Sunkara and T. F.  
15 Jaramillo, *Nano Lett.*, 2011, **11**, 4168.
- 16 S9. J. Bonde, P. G. Moses, T. F. Jaramillo, J. K. Nørskov and I. Chorkendorff,  
17 *Faraday Discuss.*, 2008, **140**, 219.
- 18 S10. T. F. Jaramillo, J. Bonde, J. Zhang, B. L. Ooi, K. Andersson, J. Ulstrup and I.  
19 Chorkendorff, *J. Phys. Chem. C*, 2008, **112**, 17492.
- 20 S11. Y. Zhao, F. Zhao, X. Wang, C. Xu, Z. Zhang, G. Shi and L. Qu, *Angew. Chem.*  
21 *Int. Ed.*, 2014, **53**, 13934.
- 22 S12. H. Gu, L. Zhang, Y. Huang, Y. Zhang, W. Fan and T. Liu. *RSC Adv.*, 2016, **6**,  
23 13757.
- 24 S13. T.N. Kumar, N. Chandrasekaran and K. L. Phani, *Chem. Commun.*, 2015, **51**,  
25 5052.
- 26 S14. D. Gopalakrishnan, D. Damien and M. M. Shaijumon, *ACS Nano*, 2014, **8**, 5297.
- 27 S15. D. Merki, H. Vrubel, L. Rovelli, S. Fierro and X. Hu, *Chem. Sci.*, 2012, **3**, 2515.
- 28 S16. Y. Yan, B. Xia, Z. Xu, X. Wang, *ACS. Catal.*, 2014, **4**, 1693.
